# Supplementary material for: Biogenic and anthropogenic sources of isoprene and monoterpenes and their secondary organic aerosol in Delhi, India
Source: Copernicus journal article supplement (doi:10.5194/acp-2022-603), 2022-09-14
Supplement: Supplementary file 1 [file acp-2022-603-supplement.pdf]

1 **Biogenic and anthropogenic sources of isoprene and monoterpenes and their secondary organic**  
2 **aerosol in Delhi, India**

3 Daniel J. Bryant<sup>1</sup>, Beth S. Nelson<sup>1</sup>, Stefan J. Swift<sup>1a</sup>, Sri Hapsari Budisulistiorini<sup>1</sup>, Will S. Drysdale<sup>1,2</sup>,  
4 Adam R. Vaughan<sup>1</sup>, Mike J. Newland<sup>1b</sup>, James R. Hopkins<sup>1,2</sup>, James M. Cash<sup>3,4</sup>, Ben Langford<sup>3</sup>, Eiko  
5 Nemitz<sup>3</sup>, W. Joe F. Acton<sup>5c</sup>, C. Nicholas Hewitt<sup>5</sup>, Tuhin Mandal<sup>6</sup>, Bhola R. Gurjar<sup>6</sup>, Shivani<sup>6d</sup>, Ranu  
6 Gadi<sup>6</sup>, James D. Lee<sup>1,2</sup>, Andrew R. Rickard<sup>1,2</sup>, Jacqueline F. Hamilton<sup>1</sup>

7 1- Wolfson Atmospheric Chemistry Laboratories, Department of Chemistry, University of York,  
8 Heslington, York, YO10 5DD, UK

9 2- National Centre for Atmospheric Science, University of York, Heslington, York, YO10 5DD, UK

10 3- UK Centre for Ecology and Hydrology, Penicuik, Midlothian, Edinburgh, EH26 0QB, UK

11 4- School of Chemistry, University of Edinburgh, Edinburgh, EH9 3FJ, Edinburgh, UK

12 5- Lancaster Environment Centre, Lancaster University, Lancaster, LA1 4YW, UK

13 6- Department of Applied Sciences and Humanities, Indira Gandhi Delhi Technical University for  
14 Women, Delhi, 110006, India

15 <sup>a</sup> now at: J. Heyrovsky Institute of Physical Chemistry, Department of Chemistry of Ions in Gaseous  
16 Phase, Prague, Czech Republic

17 <sup>b</sup> now at: ICARE-CNRS, 1 C Av. de la Recherche Scientifique, 45071 Orléans CEDEX 2, France

18 <sup>c</sup> now at: School of Geography, Earth and Environmental Sciences, University of Birmingham,  
19 Birmingham, B15 2TT, UK

20 <sup>d</sup> now at: Department of Chemistry, Miranda House, Delhi University, Delhi, 110007, India

21 **Data Processing**

22 Identified compounds were input into the compound library in the generic form: C<sub>c</sub>H<sub>h</sub>O<sub>o</sub>N<sub>n</sub>S<sub>s</sub> (where  
23 c,h,o,n,s represent the number of carbon, hydrogen, oxygen, nitrogen and sulfur atoms  
24 respectively). Where multiple isomers were observed, each isomer was added to the library  
25 independently, based on its retention time (RT). The UHPLC/ESI-HR-MS data for each standard and  
26 ambient sample were analysed using Tracefinder general Quan software (Thermo Fisher Scientific).  
27 Blank subtractions were undertaken for all ambient samples, using a field blank. Tracefinder  
28 extracted compound peak areas from each sample based on the assigned library. The mass  
29 tolerance of the method was set to 3 ppm, with the RT window set to 10 s. The peak tailing factor  
30 was set to 2.0 and the detection algorithm used was ICIS, with a nearest RT detection strategy.  
31 Minimum signal-to-noise (S/N) for a positive identification was set to 3.0. The suitability of the peak  
32 was also assessed for a positive identification, with the peak height at which to compare symmetry  
33 of the left and right side of the peaks set to 40 % and symmetry threshold which is the minimum  
34 percentage difference considered symmetrical set to 70 %.

35 **Matrix effects**

36 The measured signal intensity of the standards in a blank solvent matrix were compared to the  
37 ambient aerosol matrix. A 10 µL mixture containing camphorsulfonic acid, 2-MG-OS and 2-MT-OS at  
38 10 ppm was spiked into either 100 µL of ambient filter sample extract or into 100 µL of blank 50:50  
39 (MeOH:H<sub>2</sub>O) solvent. The samples were run as described above. The matrix effect factors were then  
40 calculated by taking the compound areas from the spiked ambient samples, subtracting the areas of

41 compounds that were already present in the ambient sample, and then dividing by the compound  
 42 areas in the blank matrix. If no matrix effect was present the ratio would equal 1. More details of the  
 43 matrix effects associated with the different compound classes and quantification errors are  
 44 discussed in the SI. Table S1 shows the ratios across 8 ambient samples collected during both  
 45 campaigns, which represent a mixture of high and low PM<sub>2.5</sub> concentrations across different times of  
 46 day. 2-MT-OS and 2-MG-OS showed significant matrix effects, with average  $\pm$  SD matrix ratios of  
 47  $0.17 \pm 0.06$  and  $0.40 \pm 0.23$ , suggesting 83% and 60% suppressions in signal response.  
 48 Camphorsulfonic acid exhibited a much smaller matrix suppression, with an average of  $0.76 \pm 0.16$   
 49 suggesting a 24 % suppression, in line with Bryant et al., 2021. The suppression is likely due to the  
 50 large numbers of co-eluting inorganic and organic species, reducing the ionisation efficiency of the  
 51 marker compounds. Matrix correction factors were applied alongside calibrations to different  
 52 compound classes and for compounds eluting at different times.

53  
54  
55  
56  
57  
58  
59  
60  
61  
62  
63  
64  
65

Table S1. Matrix effect analysis results from 5 filter samples on three different organosulfate standards (CAM-OS – Camphorsulfonic acid, MG-OS – 2-methyl glyceric acid organosulfate, MT-OS – 2-methyl tetrol organosulfate). Alongside PM<sub>2.5</sub> and SO<sub>4</sub> concentrations. The values in bold are the average ratios between a clean matrix and an ambient sample matrix.

| Sample start date<br>(dd/mm) | Time of day | Length (hour) | PM <sub>2.5</sub><br>( $\mu\text{g m}^{-3}$ ) | SO <sub>4</sub><br>( $\mu\text{g m}^{-3}$ ) | CAM-OS                            | MG-OS                             | MT-OS                             |
|------------------------------|-------------|---------------|-----------------------------------------------|---------------------------------------------|-----------------------------------|-----------------------------------|-----------------------------------|
| 16/10                        | 13:30-14:30 | 1             | NA                                            | 18.2                                        | 0.67                              | 0.49                              | 0.21                              |
| 18/10                        | 09:30-10:00 | 0.5           | NA                                            | 25                                          | 0.60                              | 0.58                              | 0.23                              |
| 18/10                        | 19:00-09:30 | 14.5          | 120.2                                         | 11                                          | 0.69                              | 0.10                              | 0.16                              |
| 30/05                        | 17:30-08:00 | 14.5          | 134                                           | 12.8                                        | 0.84                              | 0.22                              | 0.06                              |
| 04/06                        | 08:30-11:30 | 3             | 124.7                                         | 19.7                                        | 1.01                              | 0.59                              | 0.16                              |
| Average                      |             |               |                                               |                                             | <b>0.76 <math>\pm</math> 0.16</b> | <b>0.40 <math>\pm</math> 0.23</b> | <b>0.17 <math>\pm</math> 0.06</b> |

66  
67  
68  
69

Table S2. Average pollutant and meteorological values across the pre- and post-monsoon campaigns.

| Pollutant                                   | Pre-   |        |       |       | Post- |        |      |      |
|---------------------------------------------|--------|--------|-------|-------|-------|--------|------|------|
|                                             | Mean   | Median | SD    | Max   | Mean  | Median | SD   | Max  |
| NO (ppbv)                                   | 17.8   | 1.65   | 66.1  | 474   | 176   | 71.8   | 223  | 871  |
| NO <sub>2</sub> (ppbv)                      | 30.8   | 25     | 17.9  | 109   | 41.7  | 38.1   | 21.1 | 169  |
| NO <sub>x</sub> (ppbv)                      | 48.7   | 27.2   | 77.3  | 548   | 218   | 123    | 221  | 900  |
| SO <sub>2</sub> (ppbv)                      | 5.29   | 3.55   | 15.8  | 431   | 5.41  | 4.72   | 3.95 | 69.6 |
| O <sub>3</sub> (ppbv)                       | 50.8   | 46.8   | 30.6  | 182   | 22.4  | 5.91   | 29.4 | 285  |
| PM <sub>2.5</sub> (µg m <sup>-3</sup> )     | 141    | 125    | 66.2  | 672   | 182   | 170    | 93.9 | 695  |
| Inorg SO <sub>4</sub> (µg m <sup>-3</sup> ) | 16.9   | 17.7   | 4.56  | 26.7  | 16.5  | 16.2   | 3.38 | 26.4 |
| Org SO <sub>4</sub> (µg m <sup>-3</sup> )   | 7.5    | 7.3    | 1.78  | 13.2  | 5.55  | 5.16   | 2.68 | 14.2 |
| Organics (µg m <sup>-3</sup> )              | 19.8   | 15.8   | 13.7  | 114   | 48.7  | 37.8   | 35.4 | 221  |
| Nitrate (µg m <sup>-3</sup> )               | 1.58   | 1.13   | 1.36  | 8.01  | 5.83  | 4.68   | 4.18 | 28.8 |
| PBLH (m)                                    | 891    | 508    | 879   | 4064  | 412   | 84.9   | 601  | 2722 |
| ws (ms <sup>-1</sup> )                      | 3.81   | 4.1    | 1.44  | 8.23  | 1.71  | 1.8    | 1.33 | 5.4  |
| Temp (°C)                                   | 35.8   | 35.5   | 4.53  | 46.5  | 24.7  | 24.5   | 4.56 | 35   |
| RH (%)                                      | 39.4   | 39.3   | 13.6  | 70.6  | 57.3  | 58.1   | 16.6 | 90.1 |
| Isoprene (ppbv)                             | 1.22   | 0.51   | 1.28  | 4.62  | 0.93  | 0.79   | 0.65 | 6.67 |
| limonene (ppbv)                             | 0.0095 | 0.0065 | 0.017 | 0.19  | 0.42  | 0.19   | 0.51 | 2.12 |
| α-pinene (ppbv)                             | 0.034  | 0.034  | 0.011 | 0.078 | 0.1   | 0.052  | 0.11 | 0.56 |

70

71

72

73

74

75

76

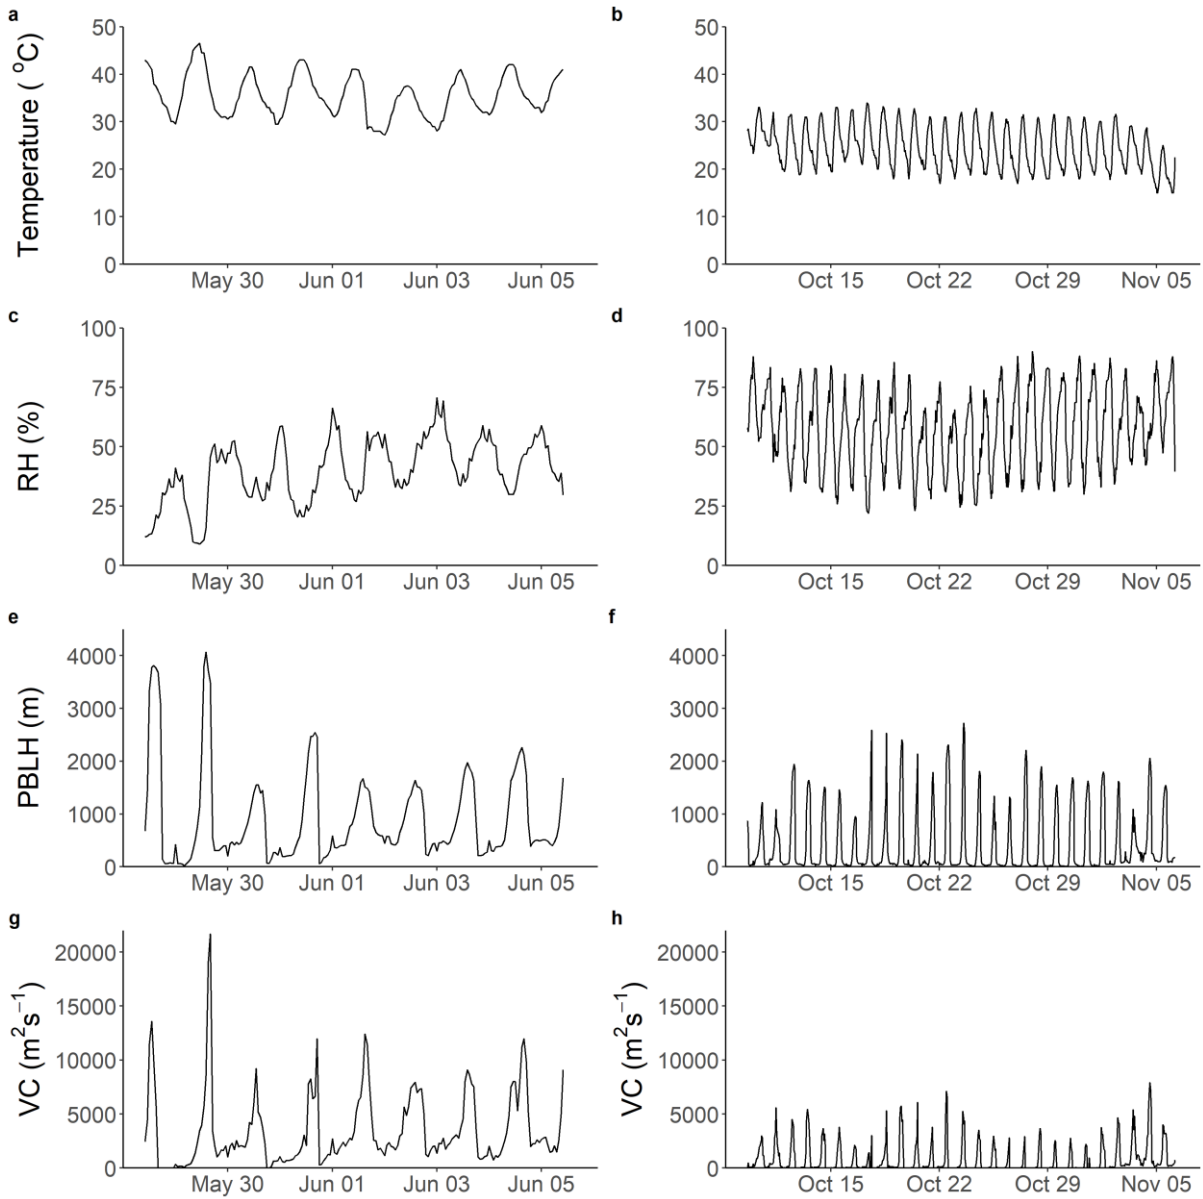

77

78

79

80

Figure S1. Time series variations of measured temperature, planetary boundary layer height (PBLH), relative humidity (RH) and ventilation coefficient (VC, PBLH x wind speed) across pre- (left, a, c, e, g) and post- (right, b, d, f, h) monsoon.

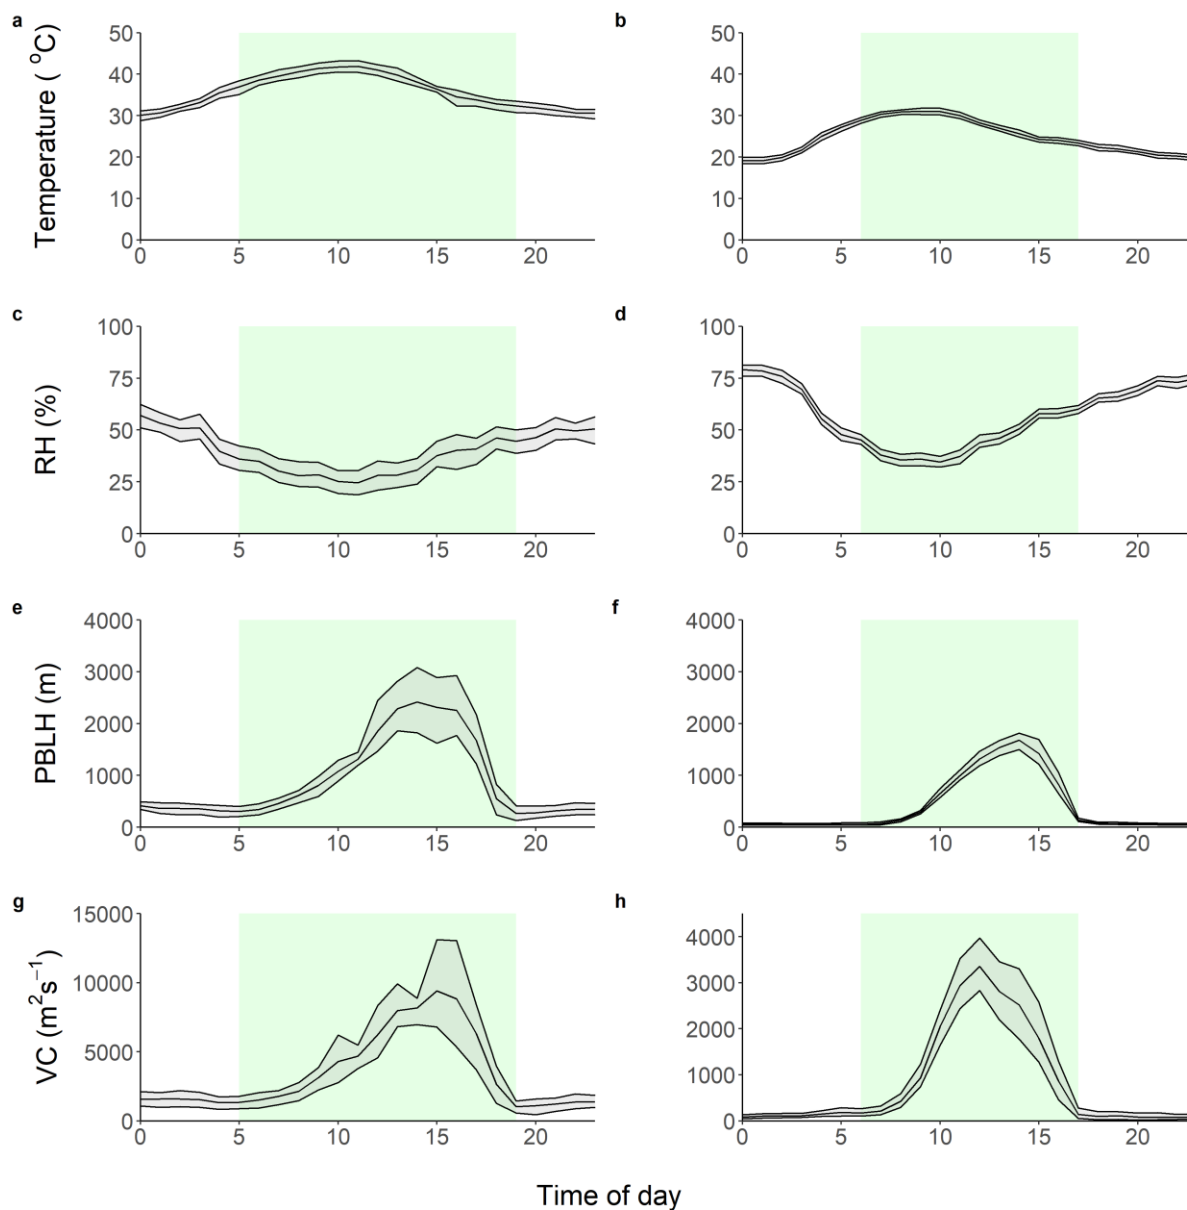

Figure S2. Diurnal variations of temperature, relative humidity (RH), planetary boundary layer height (PBLH) and ventilation coefficient (VC, PBLH \* wind speed) across the pre- (left, a, c, e, g) and post-monsoon (right, b, d, f, h) campaigns. The grey shaded area represents the 95 % confidence interval. The green shaded area represents the times driven by biogenic emissions, as defined by the isoprene diurnals (Figure 3).

82  
83  
84

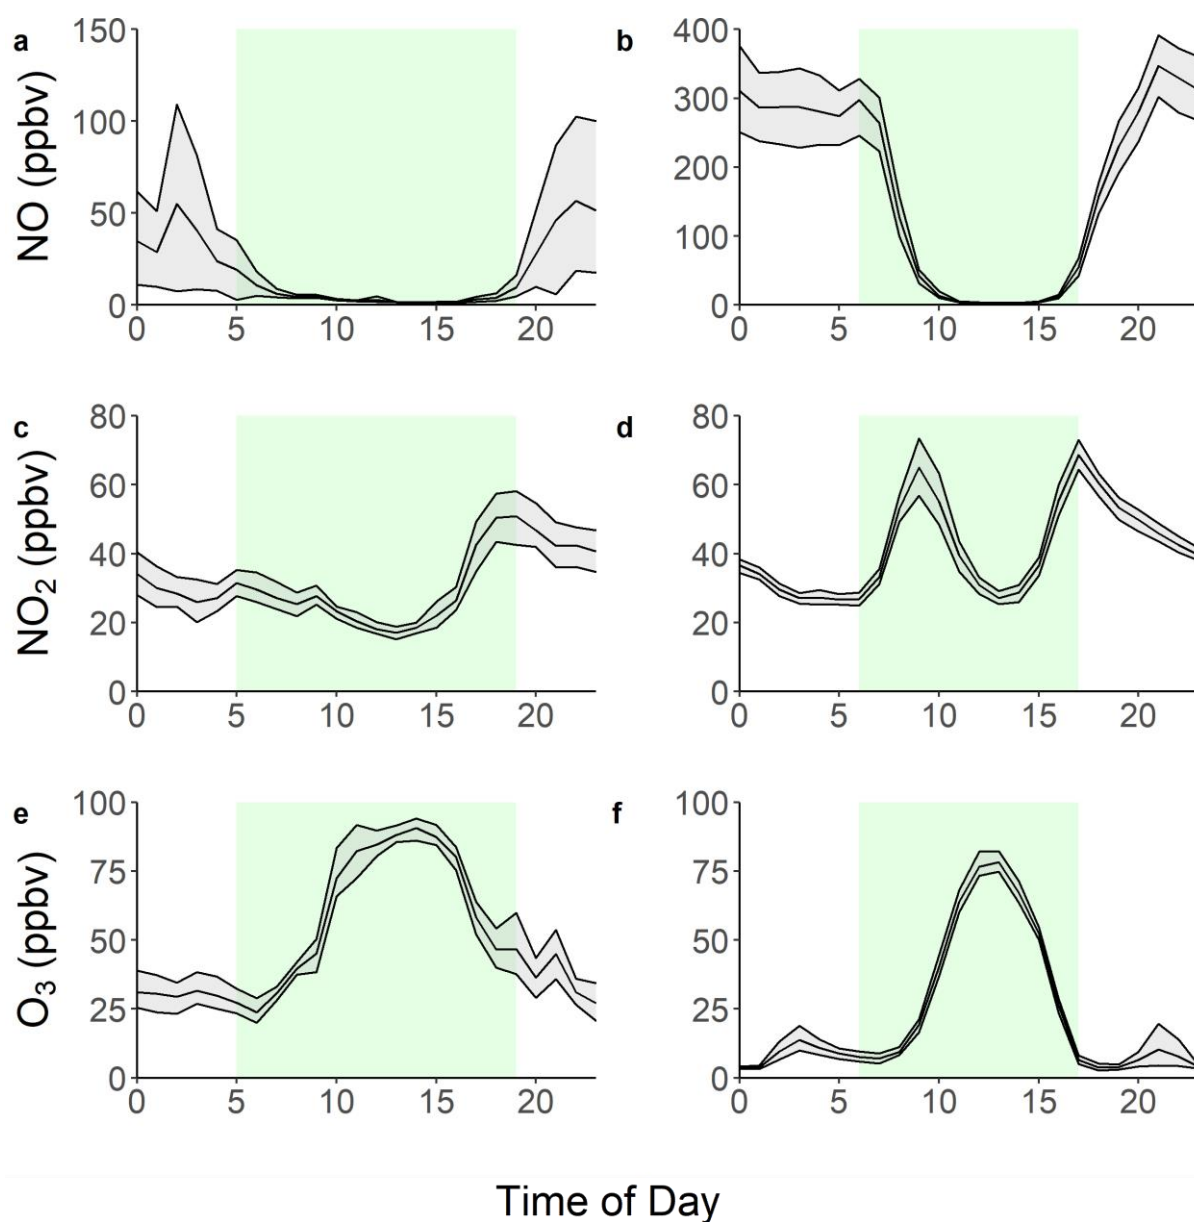

Figure S3. Diurnal variations of NO, NO<sub>2</sub> and O<sub>3</sub> across the pre (left, a,c,e) and post-monsoon (right, b,d,f) campaigns. The grey shaded area represents the 95 % confidence interval. The green shaded area represents the times driven by biogenic emissions, as defined by the isoprene diurnals (Figure 3).

85  
86  
87  
88  
89  
90  
91  
92  
93  
94  
95  
96  
97  
98  
99  
100  
101  
102  
103  
104  
105  
106  
107  
108  
109  
110  
111  
112  
113  
114  
115

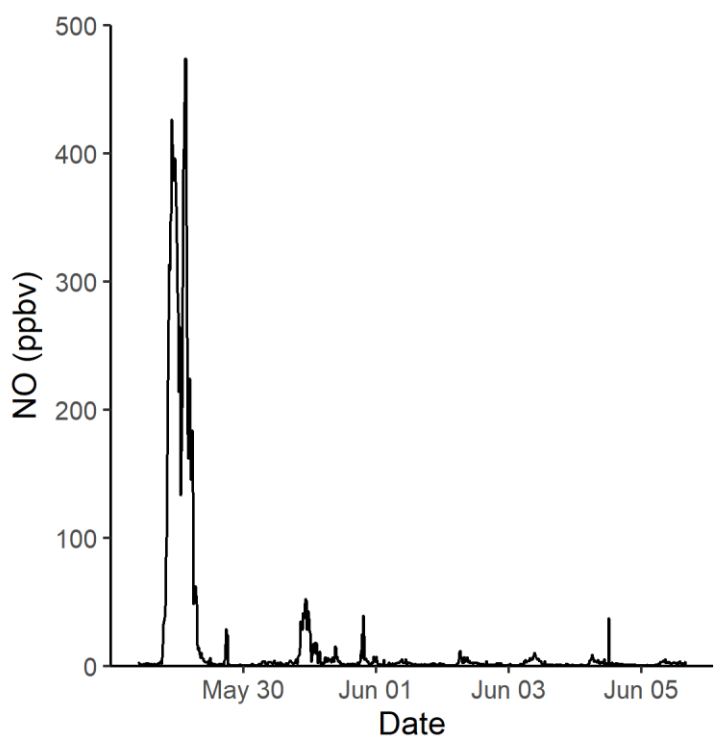

Figure S4. Full time series of NO concentrations during the pre-monsoon campaign.

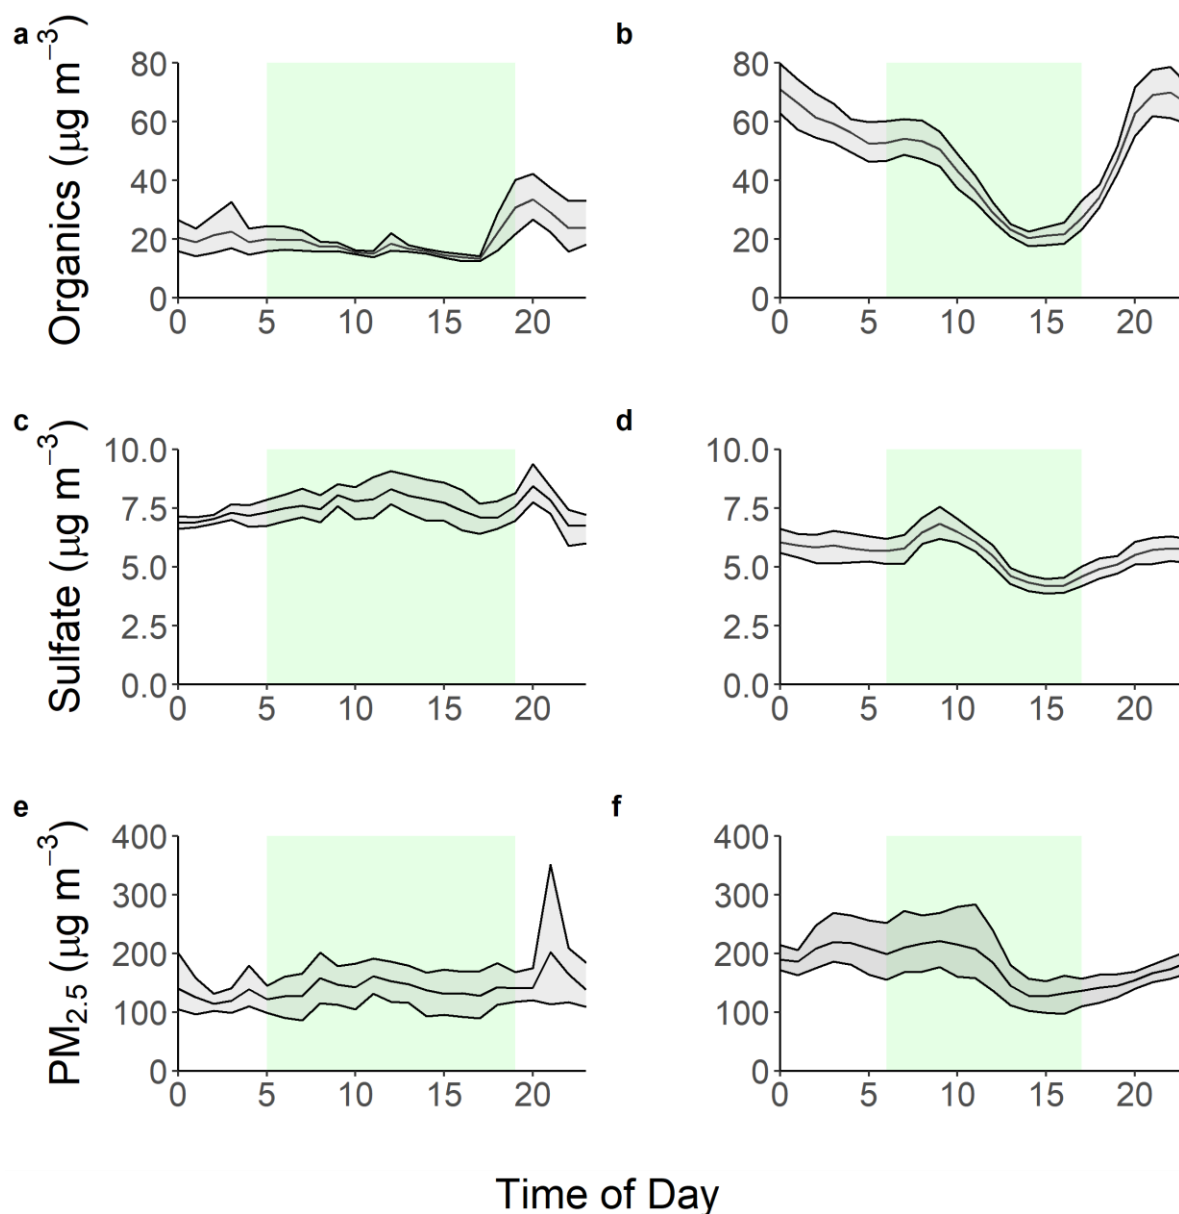

116

117

118 Figure S5. Mean diurnal variations for the aerosol chemical species, sulfate and total organics and  
 119 PM<sub>2.5</sub> concentrations across the pre-monsoon (left, a,c,e) and post-monsoon (right, b,d,f). The 95  
 120 % confidence interval is given in grey. The green sections highlight the daytime hours as defined  
 121 by the isoprene diurnal.

121

122

123

124

125

126



127

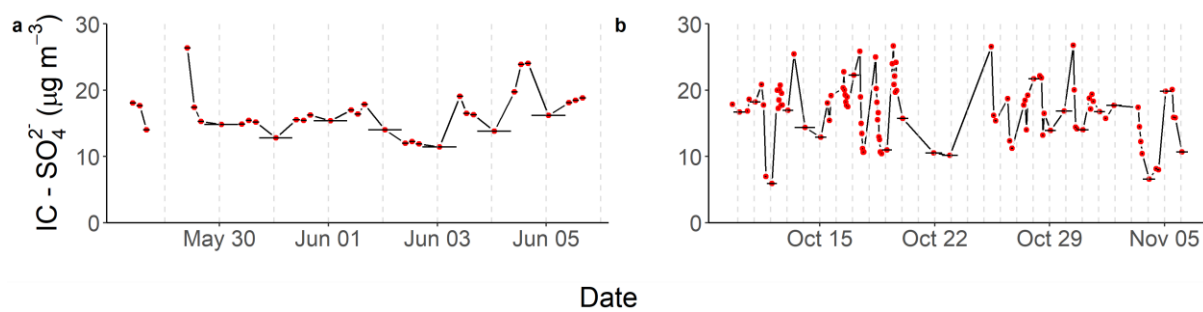

128

129

Figure S6. Time series across the pre- (left,a) and post-monsoon (right,b) campaigns of inorganic sulfate quantified by ion chromatography. The vertical dotted lines represent midnight for each day. Only species identified in more than 40 % of the samples for each campaign were included.
